# Supplementary material for: Structure of a fully assembled γδ T cell antigen receptor
Source: Springer Nature journal article supplement (doi:10.1038/s41586-024-07920-0), 2024-08-15
Supplement: MOESM1 [file 41586_2024_7920_MOESM1_ESM.pdf]

**Supplementary information**

---

**Structure of a fully assembled  $\gamma\delta$  T cell antigen receptor**

---

In the format provided by the authors and unedited

## **Supplementary information**

### **Structure of a fully assembled $\gamma\delta$ T-cell antigen receptor**

Benjamin S. Gully, João Ferreira Fernandes, Sachith D. Gunasinghe, Mai T. Vuong,  
Yuan Lui, Michael T. Rice, Liam Rashleigh, Chan-sien Lay, Dene R. Littler, Sumana Sharma,  
Ana Mafalda Santos, Hariprasad Venugopal, Jamie Rossjohn & Simon J. Davis

**Supplementary Figure 1**

**Supplementary Table 1**

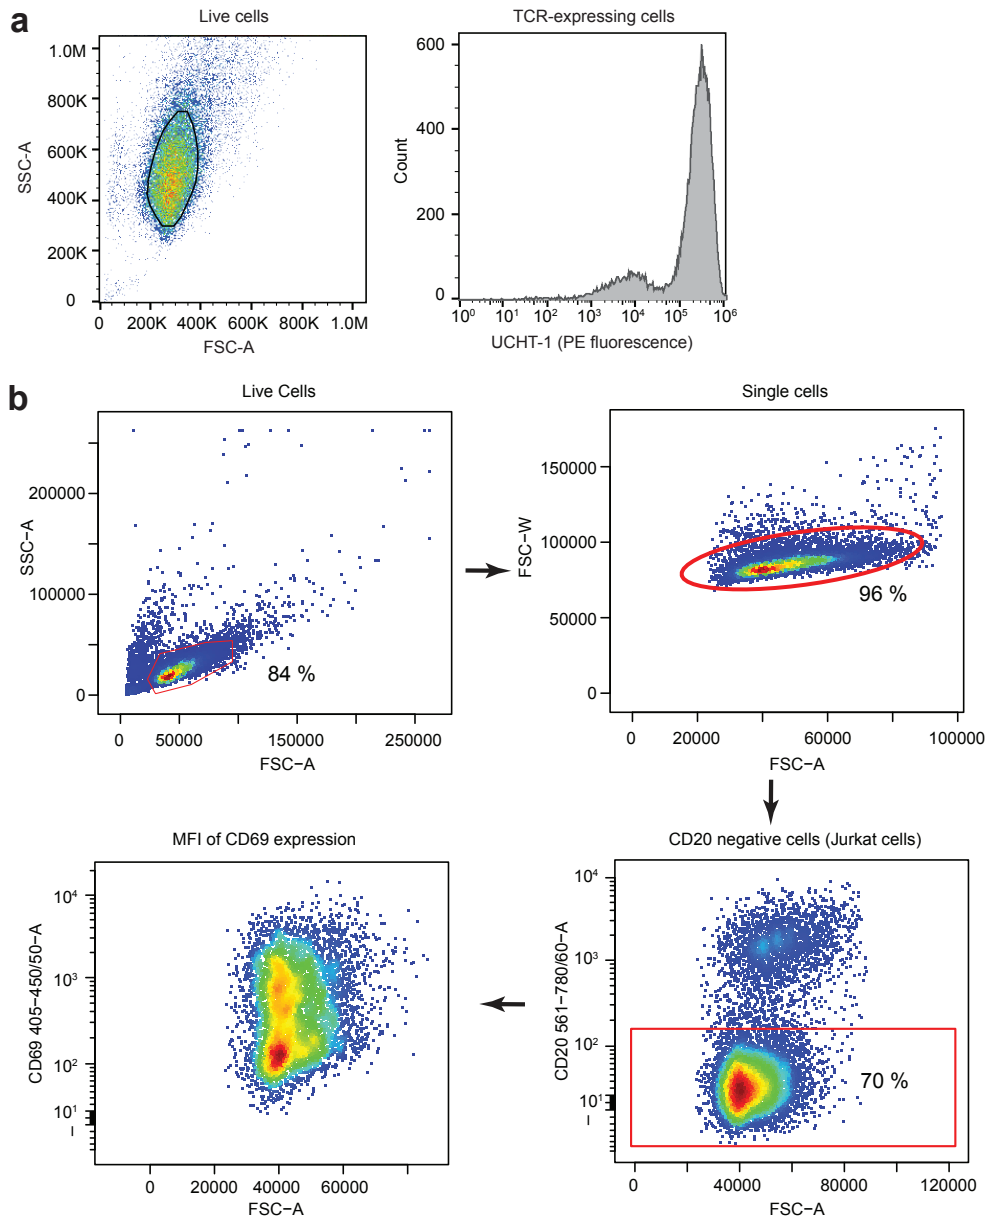

**Supplementary Figure 1 | Gating strategies for flow cytometry. a**, Representative gating strategy for surface molecule staining of the Jurkat T-cell lines. **b**, Representative gating strategy for measurements of CD69 expression in the T-cell activation assay.

**Supplementary Table 1 | Sequences of the protein constructs used in this study**

| Name                                                                                                                                                                                         | Protein sequence                                                                                                                                                                                                                                                                                                                                                                                                                                                                                                                                                                                                                                                                                                                                                                                                                                                                                                                                                                                                                                                                                                                                                                                                                                                                                                                                                                                                                                                                            |
|----------------------------------------------------------------------------------------------------------------------------------------------------------------------------------------------|---------------------------------------------------------------------------------------------------------------------------------------------------------------------------------------------------------------------------------------------------------------------------------------------------------------------------------------------------------------------------------------------------------------------------------------------------------------------------------------------------------------------------------------------------------------------------------------------------------------------------------------------------------------------------------------------------------------------------------------------------------------------------------------------------------------------------------------------------------------------------------------------------------------------------------------------------------------------------------------------------------------------------------------------------------------------------------------------------------------------------------------------------------------------------------------------------------------------------------------------------------------------------------------------------------------------------------------------------------------------------------------------------------------------------------------------------------------------------------------------|
| <p><b>1. G83.C4 SpyT-TCR<math>\gamma</math>CD3<math>\delta\epsilon</math>_GFP2</b></p> <p>(For expression and purification of the Twin-StrepTag tagged complex, together with 2.)</p>        | <p>MLLALALLAFLPPASQKMGRGVPHIVMVDAYKRYK<br/>           SGGGSGENLYFQGGSGESGSGSSNLEGRTKSVTR<br/>           PTGSSAVITCDLPVENAVYTHWYLHQEGKAPQRLLY<br/>           YDSYNSRVVLESGISREKYHTYASTGKSLKFILENLIE<br/>           RDSGVVYCATWDYKKLFGSGTTLVVDKQLDADVS<br/>           PKPTIFLPSIAETKLQKAGTYLCLLEKFFPDVIKIHWQE<br/>           KKSNTILGSQEGNTMKTNDTYMKFSWLTVPKSLDK<br/>           EHRCIVRHENKNGVDQEIIFFPIKTDVITMDPKDNCS<br/>           KDANDTLLLQLTNTSAYMYLLLLLLKSVVYFAITCCLL<br/>           RRTAFCCNGEKSGSGQCTNYALLKLAGDVESNPGP<br/>           MEHSTFLSGLVLATLLSQVSPFKIPIELEDRVFVNCN<br/>           TSITWVEGTVGTLSDITRDLGKRILDPRGIYRCNGT<br/>           DIYKDKESTVQVHYRMCQSCVELDPATVAGIIVTDVI<br/>           ATLLLALGVFCFAGHETGRLSGAADTQALLRNDQVY<br/>           QPLRDRDDAQYSHLGGNWARNGSGEGRGSLLTC<br/>           GDVEENPGPMQSGTHWRVGLCLLSVGVWGDGN<br/>           EEMGGITQTPYKVSISGTTVILTCPQYPGSEILWQH<br/>           DKNIGGEDDDKNIGSDEDHLSLKEFSELEQSGYYVC<br/>           YPRGSKPEDANFYLYLRARVCENCMEMDVMSVATIV<br/>           IVDICITGLLLLVYYWSKNRKAKAKPVTRGAGAGGR<br/>           QRGQNKERPPPVPNPDIYPIRKGQRDLYSGLNQRR<br/>           IGDPPVATMVSKGEELFTGVVPIVELDGDVNGHKFS<br/>           VSGEGEDATYGKLTCLKFICTTGKLPVPWPTLVTTLS<br/>           YGVQCFSRYPDHMKQHDFFKSAMPEGYVQERTIFF<br/>           KDDGNYKTRAEVKFEGLTLVNRIELKIDFKEDGNIL<br/>           GHKLEYNYNSHNVYIMADKQKNGIKVNFKIRHNIEDG<br/>           SVQLADHYQQNTPIGDGPVLLPDNHYLSTQSALS<br/>           SKDPNEKRDHMLLEFVTAAGITLGMDELYK</p> |
| <p><b>2. G83.C4 TCR<math>\delta</math>CD3<math>\zeta</math><math>\gamma</math>_Strep2</b></p> <p>(For expression and purification of the Twin-StrepTag tagged complex, together with 1.)</p> | <p>MILTVGFSFLFFYRGTLCDKVTQSSPDQTVASGSEV<br/>           VLLCTYDTVYSNPDLFWYRIRPDYSFQFVYGDNSR<br/>           SEGADFTQGRFSVKHILTKAFHLVISPVRTEDSATY<br/>           YCATRLWLGDPHTDKLIFGKGRVTVPEPRSQPHTKP<br/>           SVFVMKNGTNAVACLKVEFYPKDIRINLVSSKKITEFDP<br/>           AIVISPSGKYNAVKLGKYEDSNSVTCSVQHDNKT<br/>           VHTDVEFKTDSTDHVKPKETENTKQPSKSKCHKPAI<br/>           VHTKVNMMSLTVLGLRMLFAKTAVANFLLTAKLFFLG<br/>           SGQCTNYALLKLAGDVESNPGPMKWKALFTAAILQA<br/>           QLPITEAQSFGLLDPKLCYLLDGILFIYGVILTALFLRV<br/>           KFSRSADAPAYQQGQNQLYNELNLRREEYDVL<br/>           DKRRGRDPEMGGKQRRKNPQEGLYNELQKDKMAEA<br/>           YSEIGMKGERRRGKGDGLYQGLSTATKDTYDALH<br/>           MQALPPRSGEGRGSLLTCGDVEENPGPMEQKKG<br/>           LAVLILAIILLQGTLAQSIKGNHLVKVYDYQEDGSVLLT<br/>           CDAEAKNITWFKDGMIGFLTEDKKKWNLGSNAKIS<br/>           RAGMYQCKGSQNKSKPLQVYYRMCQNCIELNAATD<br/>           P GFLFAEIVSIFVLAVGVYFIAGQDGVQRSRASDKQTL<br/>           LPNDQLYQPLKDREDDQYSHLQGNQLRRNGSGSA<br/>           WSHPPQFEKGGGSGGGSSGSSAWSHPPQFEK</p>                                                                                                                                                                                                                                                                                                                                                                                                                              |
| <p><b>3. AF-7 TCR-<math>\alpha</math> chain</b></p> <p>(For expression of the AF-7 TCR in Jurkat T-cells, together with 4.)</p>                                                              | <p>MWGVFLLYVSMKMGTTGQNIQDQPTTEMTATEGAIV<br/>           QINCTYQTSGFNGLFWYQQHAGEAPTFLSYNVL<br/>           DGL EEKGRFSSFLSRSGYSYLLKELQMKDSASYLCAV<br/>           KDSNYQLIWGAGTKLIKPDIQNPDPVYQLRDSKSS<br/>           DKSVCLFTDFDSQTNVSQSKDSDVYITDKTVLDMRS<br/>           MDFKSNSAVAWSNKSDFACANAFNNSIIPEDTFFPS<br/>           PESSCDVKLVEKSFETDTNLFQNLVIGFRILLKVA<br/>           GFNLLMTRLRLWSS</p>                                                                                                                                                                                                                                                                                                                                                                                                                                                                                                                                                                                                                                                                                                                                                                                                                                                                                                                                                                                                                                                                                              |
| <p><b>4. AF-7 TCR-<math>\beta</math> chain</b></p> <p>(For expression of the AF-7 TCR in Jurkat T-cells, together with 3.)</p>                                                               | <p>MGILPSPGMPALLSLVSLLSVLLMGCVAETSYPYDVP<br/>           DYAGGSGTSNAGVTQTPKFQVLKTGQSMTLQCAQD<br/>           MNHNSMYWYRQDPGMGLRLIYYSASEGTTDKGEVP<br/>           NGYNVSRNLNKRFLRLESAAPSQTSVYFCASSVWT<br/>           GEGSGELFFGEGSRLTVLEDLKNVFPKAVFEPSE</p>                                                                                                                                                                                                                                                                                                                                                                                                                                                                                                                                                                                                                                                                                                                                                                                                                                                                                                                                                                                                                                                                                                                                                                                                                                     |

|                                                                                                                                                       |                                                                                                                                                                                                                                                                                                                                                                       |
|-------------------------------------------------------------------------------------------------------------------------------------------------------|-----------------------------------------------------------------------------------------------------------------------------------------------------------------------------------------------------------------------------------------------------------------------------------------------------------------------------------------------------------------------|
|                                                                                                                                                       | AEISHTQKATLVCLATGFYPDHVELSWWWNGKEVHS<br>GVSTDPQPLKEQPALNDSRYCLSSRLRVSATFWQN<br>PRNHFRQCQVQFYGLSENDEWTQDRAKPVTQIVSAE<br>AWGRADCGFTSESYQQGVLSATILYEILLGKATLYAV<br>LVSALVLMAMVKRKDSRG                                                                                                                                                                                    |
| 5. <b>G83.C4 TCR-γ chain</b><br><br>(For expression of the G83.C4 TCR in Jurkat T-cells, together with 6.)                                            | MLLALALLAFLPPASQKTSYPYDVPDYAGGSGTSS<br>SNLEGRTKSVTRPTGSSAVITCDLPVENAVYTHWYL<br>HQEGKAPQRLLYYDSYNSRVVLESGISREKYHTYAS<br>TGKSLKFILENLIERDSGVYYCATWDYKFLFGSGTTL<br>VVTDKQLDADVSPKPTIFLPSIAETKLQKAGTYLCLLE<br>KFFPDVIKIHVQEKKSNTILGSQEGNTMKTNDTYMKF<br>SWLTVPEKSLDKEHRCIVRHENNKNGVDQEIIFPIK<br>TDVITMDPKDNCSKDANDTLLLQLTNTSAYMYLLLL<br>LKSVVYFAITCCLLRRTAFCCNGEKS         |
| 6. <b>G83.C4 TCR-δ chain</b><br><br>(For expression of the G83.C4 TCR in Jurkat T-cells, together with 5.)                                            | MILTVGFSFLFFYRGTLCDKVTQSSPDQTVASGSEV<br>VLLCTYDTVYSNPDLFWYRIRPDYSFQFVYGDNSR<br>SEGADFTQGRFSVKHILTKQAFHLVISPVRTEDSATY<br>YCATRLWLGDPHTDKLIFGKGTRVTVPEPSQPHTKP<br>SVFVMKNGTNVACLVEKFPKDIRINLVSSKITEFDP<br>AIVISPSGKYNAVKLGKYEDSNSVTCSVQHDNKT VH<br>STDFEVKTDSTDHVKPKETENTKQPSKSKCHKPKAIV<br>HTEKVNMMSLTVLGLRMLFAKTAVNFLLTAKLFFL                                         |
| 7. <b>AF-7 V-α/C-δ chain</b><br><br>(For expression of the chimeric AF-7 TCR in Jurkat T-cells, together with 8; C-δ chain sequence underlined.)      | MWGVFLLYVSMKMGTTGQNIQPTTEMTATEGAIV<br>QINCTYQTSGFNGLFWYQQHAGEAPTFLSYNVLDGL<br>EEKGRFSSFLSRKGYSYLLKELQMKDSASYLCAV<br>KDSNYQLIWGAGTKLIKPDSQPHTKPSVFMKNGTN<br><u>VACLVEKFPKDIRINLVSSKITEFDP AIVISPSGKYNAVKLGKYEDSNSVTCSVQHDNKT VHSTDFEVKTDSTDHVKPKETENTKQPSKSKCHKPKAIVHTEKVNMMSLTVLGLRMLFAKTAVNFLLTAKLFFL</u>                                                            |
| 8. <b>AF-7 V-β/C-γ chain</b><br><br>(For expression of the chimeric AF-7 TCR in Jurkat T-cells, together with 7; C-γ chain sequence underlined.)      | MGILPSPGMPALLSLVSLLSVLLMGCVAETSYPYDVP<br>DYAGGSGTSNAGVTQTPKFQVLKTGQSMTLQCAQD<br>MNHNSMYWYRQDPGMGLRLIYSAEGTTDKGEVP<br>NGYNVSRNLNKRFLRLESAAPSQTSVYFCASSVWT<br>GEGSGELFFGEGSRLTVLEDKQLDADVSPKPTIFLPS<br><u>IAETKLQKAGTYLCLLEKFFPDVIKIHVQEKKSNTILGSQEGNTMKTNDTYMKF SWLTVPEKSLDKEHRCIVRHENNKNGVDQEIIFPIKTDVITMDPKDNCSKDANDTLLLQLTNTSAYMYLLLLLKSVVYFAITCCLLRRTAFCCNGEKS</u> |
| 9. <b>G83.C4 V-γ/C-β chain</b><br><br>(For expression of the chimeric G83.C4 TCR in Jurkat T-cells, together with 10; C-β chain sequence underlined.) | MLLALALLAFLPPASQKTSYPYDVPDYAGGSGTSS<br>SNLEGRTKSVTRPTGSSAVITCDLPVENAVYTHWYL<br>HQEGKAPQRLLYYDSYNSRVVLESGISREKYHTYAS<br>TGKSLKFILENLIERDSGVYYCATWDYKFLFGSGTTL<br>VVDLKNVFPKVAVFEPSEAEISHTQKATLVCLATG<br>FYPDHVELSWWWNGKEVHSGVSTDPQPLKEQPALN<br><u>DSRYCLSSRLRVSATFWQNP RNHFRCQVQFYGLSENDEWTQDRAKPVTQIVSAEAWGRADCGFTSESYQQGVLSATILYEILLGKATLYAVLVSALVLMAMVKRKDSRG</u>   |
| 10. <b>G83.C4 V-δ/C-α chain</b><br><br>(For expression of the chimeric G83.C4 TCR in Jurkat T-cells, together with 9; C-α chain sequence underlined.) | MILTVGFSFLFFYRGTLCDKVTQSSPDQTVASGSEV<br>VLLCTYDTVYSNPDLFWYRIRPDYSFQFVYGDNSR<br>SEGADFTQGRFSVKHILTKQAFHLVISPVRTEDSATY<br>YCATRLWLGDPHTDKLIFGKGTRVTVPEPQNPDP<br><u>VYQLRDSKSSDKSVCLFTDFDSQTNVSQSKSDVYITDKTVLDMRSMDFKSN SAVAWSNKSDFACANAFNN SIIPEDTFFPSPPESSCDVKLVEKSFETDTNLNFQNL SVIGFRILLKLVAGFNLLMTRLRLWSS</u>                                                        |
